# Supplementary material for: Preparation of dihydroquinazoline carbohydrazone Fe(ii) complexes for spin crossover
Source: Royal Society of Chemistry journal article supplement (doi:10.1039/c5nj03095a), 2016-01-01
Supplement: c5nj03095a1.pdf [file c5nj03095a1.pdf]

*Electronic supplementary information (ESI) for*

**Preparation of Dihydroquinazoline Carbohydrazone Fe(II) Complexes  
for Spin Crossover**

Fu-Xing Shen,<sup>a</sup> Wei Huang,<sup>\*a</sup> Takashi Yamamoto,<sup>b</sup> Yasuaki Einaga,<sup>b</sup> Dayu Wu<sup>a\*</sup>

<sup>a</sup>*Jiangsu Key Laboratory of Advanced Catalytic Materials and Technology,  
Collaborative Innovation Center of Advanced Catalysis & Green Manufacturing,  
School of Petrochemical Engineering, Changzhou University, Jiangsu 213164, China;  
Email: wudy@cczu.edu.cn.*

<sup>b</sup>*Department of Chemistry, Faculty of Science and Technology, Keio University,  
3-14-1 Hiyoshi, Yokohama, 223-8522, Japan.*

## 1. NMR Spectroscopy

### 2-(pyridin-2-yl)-3-((pyridin-2-ylmethylene)amino)-2,3-dihydroquinazolin-4(1H)-one

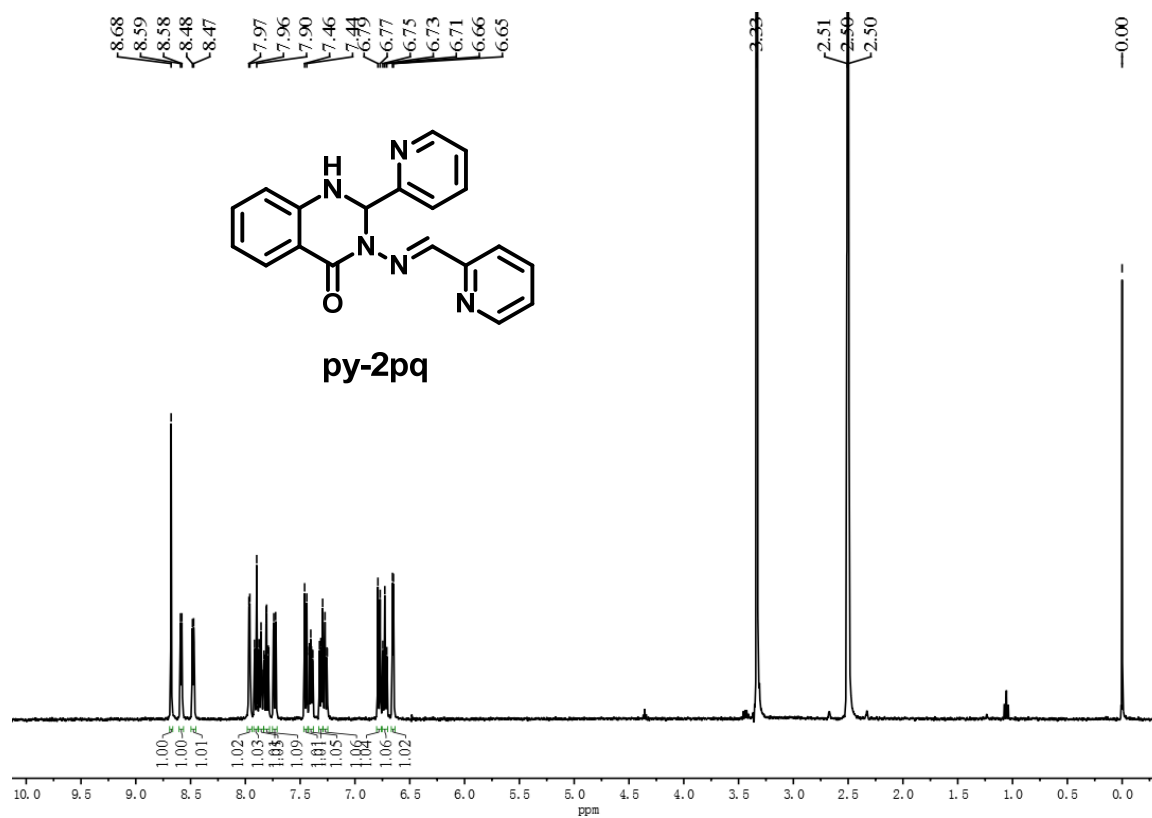

**Figure S1.** <sup>1</sup>H NMR spectrum of **pq-2py** in DMSO.

**2-amino-N'-(pyridin-2-ylmethylene)benzohydrazide**

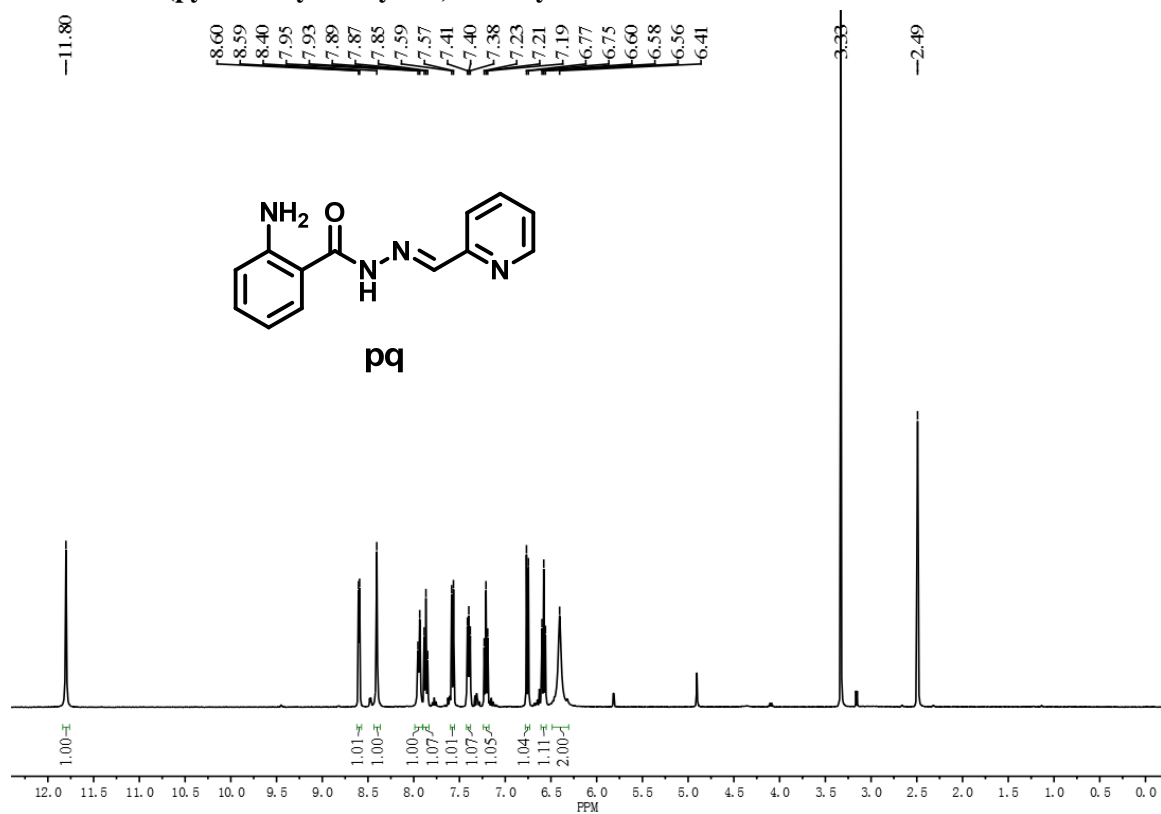

**Figure S2.** <sup>1</sup>H NMR spectrum of **pq** in DMSO.

2-(2-methoxyphenyl)-3-((pyridin-2-ylmethylene)amino)-2,3-dihydroquinazolin-4(1H)-one

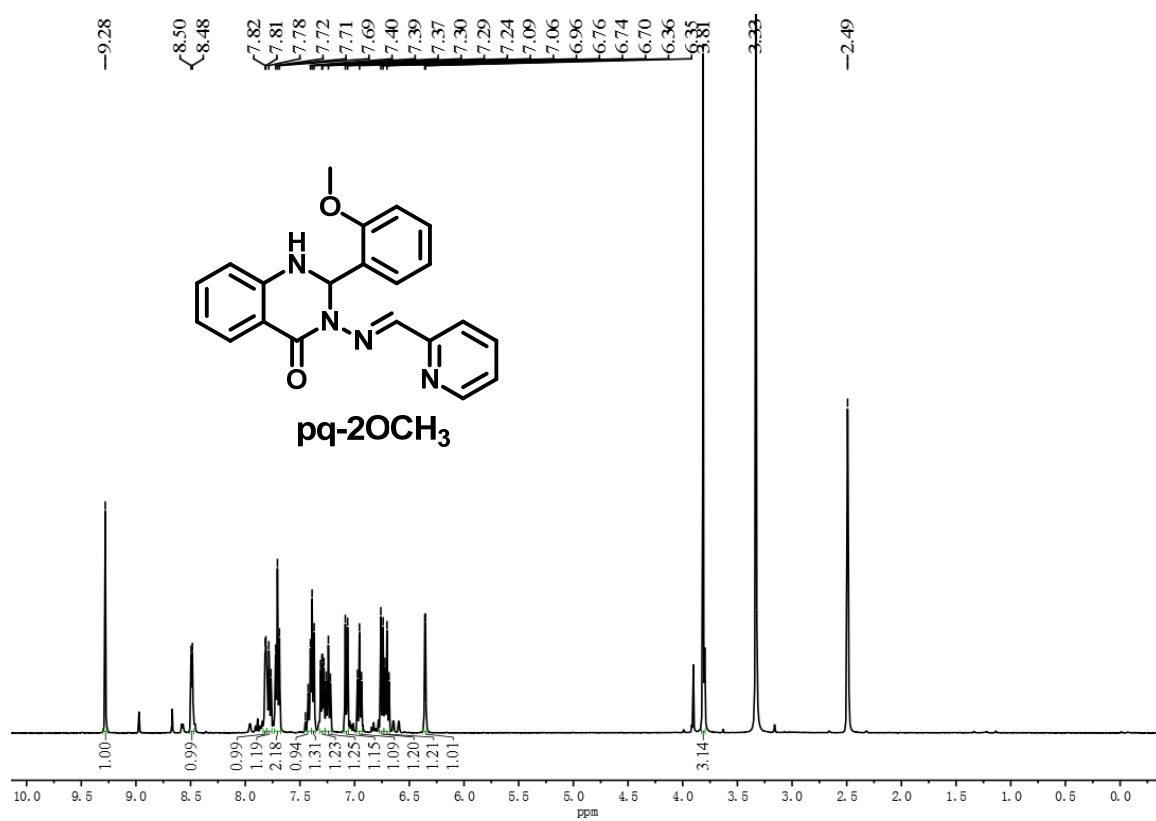

Figure S3. <sup>1</sup>H NMR spectrum of **pq-2OCH<sub>3</sub>** in DMSO.

2-(3-methoxyphenyl)-3-((pyridin-2-ylmethylene)amino)-2,3-dihydroquinazolin-4(1H)-one

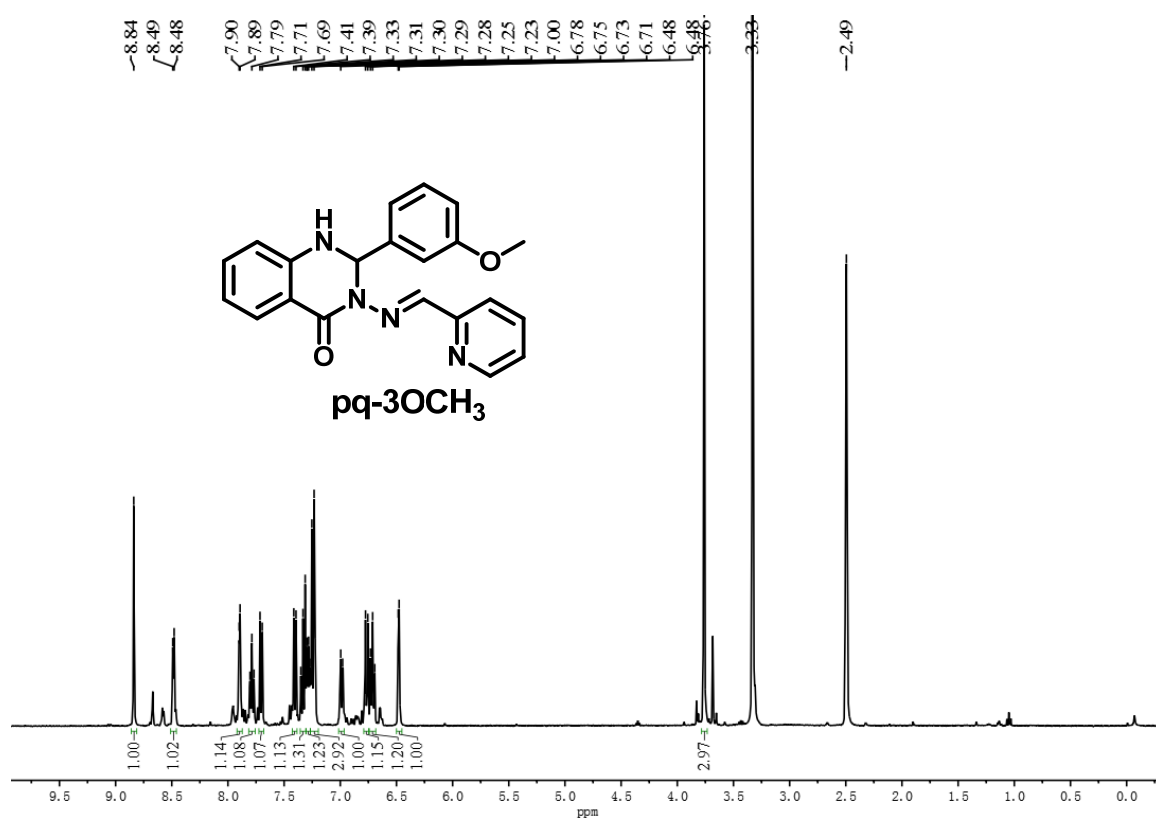

## 2. IR Spectroscopy

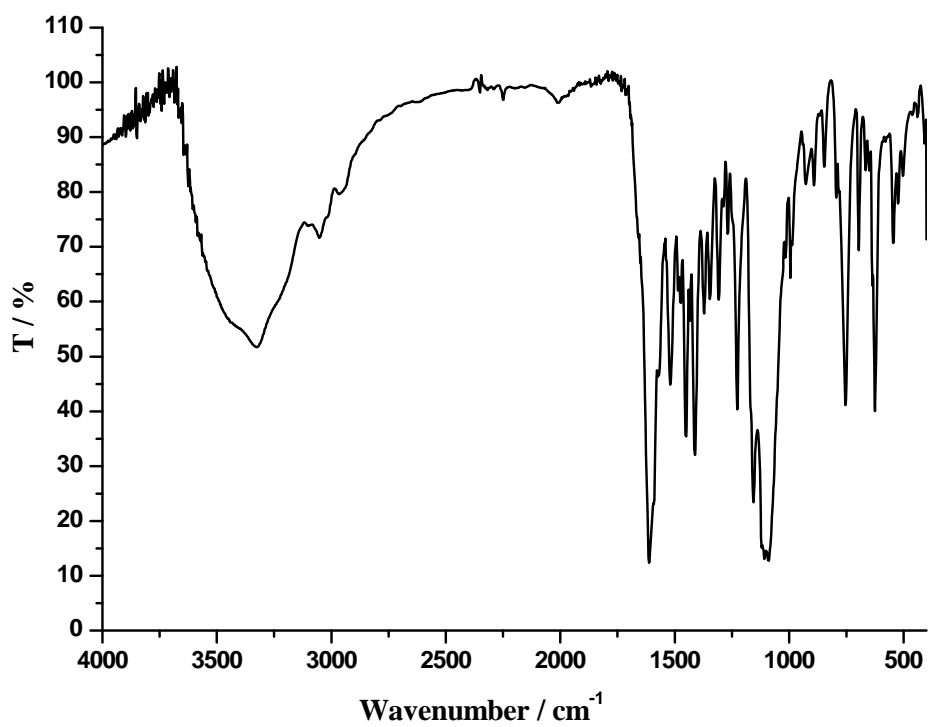

**Figure S5.** IR spectrum of  $[\text{Fe}(\text{pq-2py})_2](\text{ClO}_4)_2 \cdot \text{CH}_3\text{OH} \cdot 2\text{H}_2\text{O}$  (**1**) at room temperature.

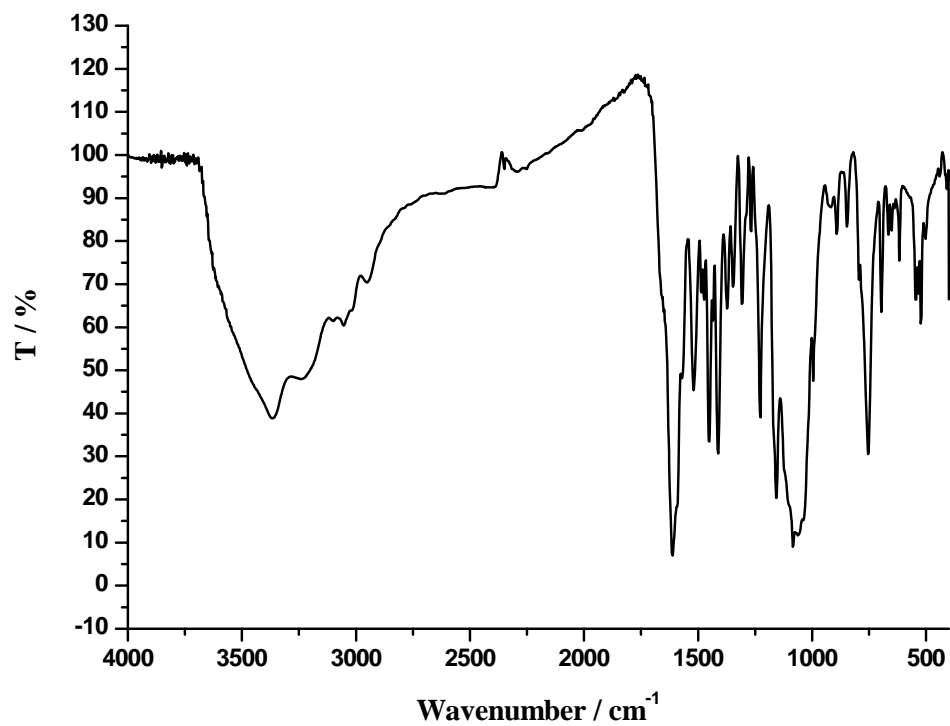

**Figure S6.** IR spectrum of  $[\text{Fe}(\text{pq-2py})_2](\text{BF}_4)_2 \cdot 2\text{CH}_3\text{CN} \cdot 1.75\text{H}_2\text{O}$  (**2**) at room temperature.

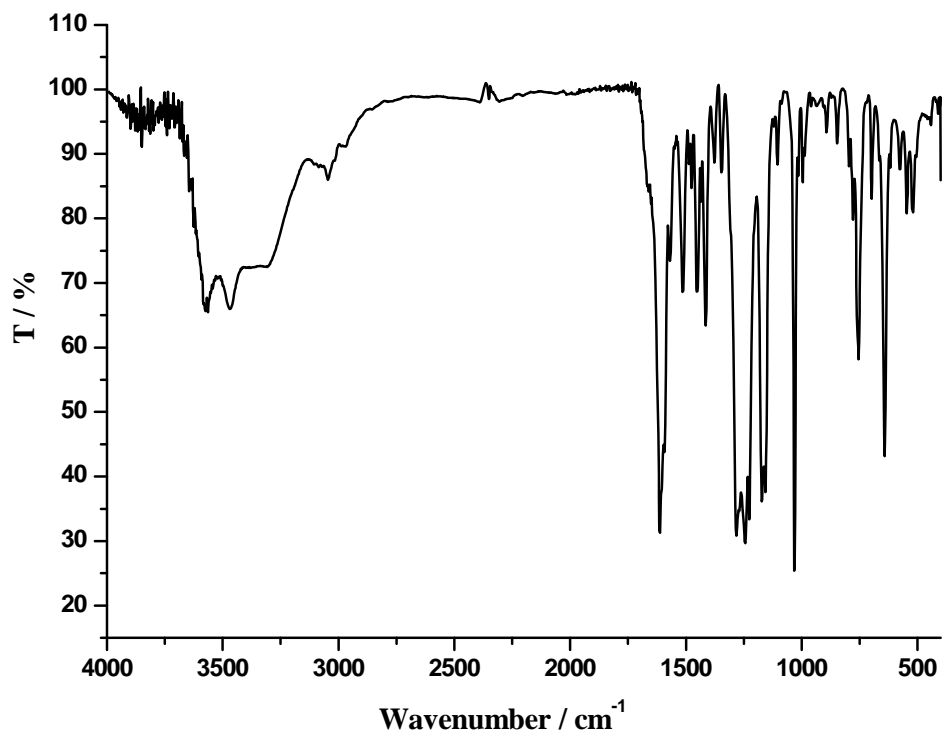

**Figure S7.** IR spectrum of  $[\text{Fe}(\text{pq-2py})_2](\text{CF}_3\text{SO}_3)_2 \cdot \text{CH}_3\text{CN} \cdot \text{CH}_3\text{OH}$  (**3**) at room temperature.



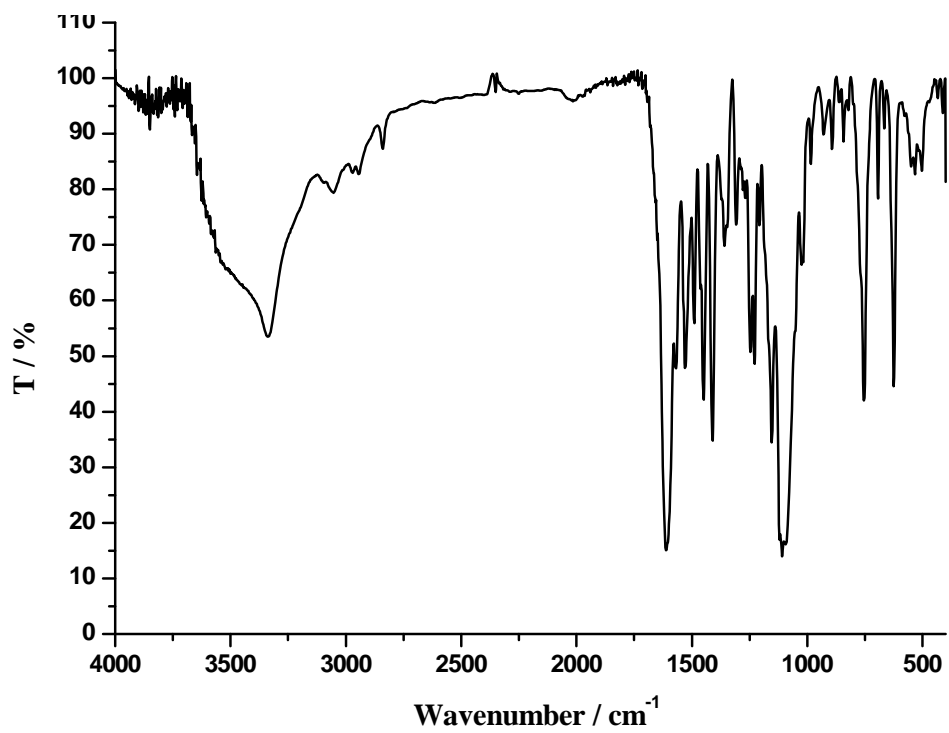

**Figure S8.** IR spectrum of  $[\text{Fe}(\text{pq-2OCH}_3)_2](\text{ClO}_4)_2 \cdot \text{H}_2\text{O}$  (**4**) at room temperature.

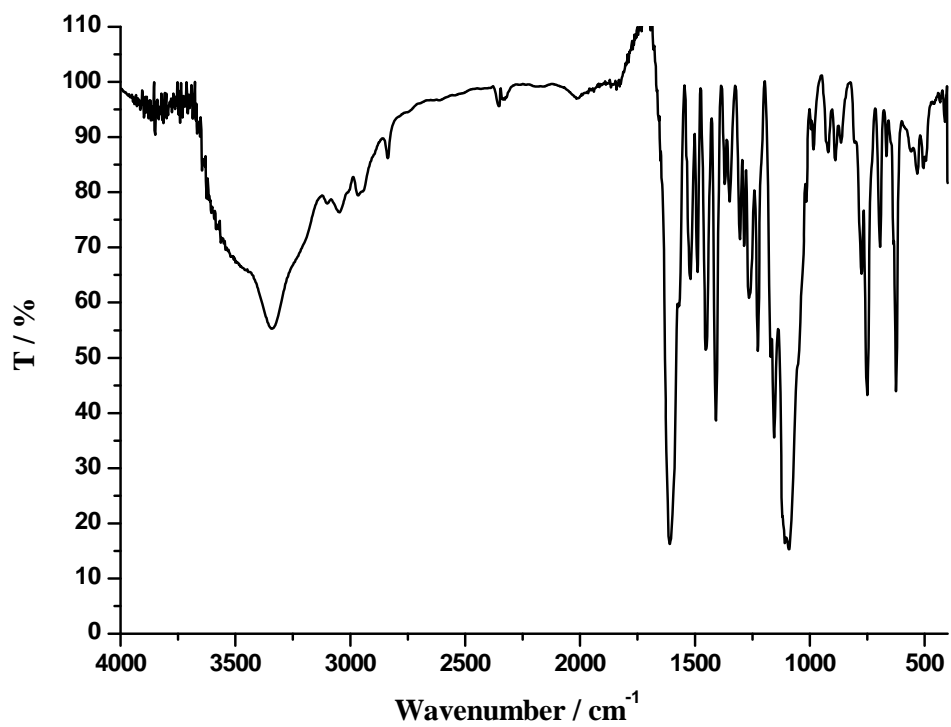

**Figure S9.** IR spectrum of  $[\text{Fe}(\text{pq-3OCH}_3)_2](\text{ClO}_4)_2 \cdot \text{H}_2\text{O}$  (**5**) at room temperature.

(a)

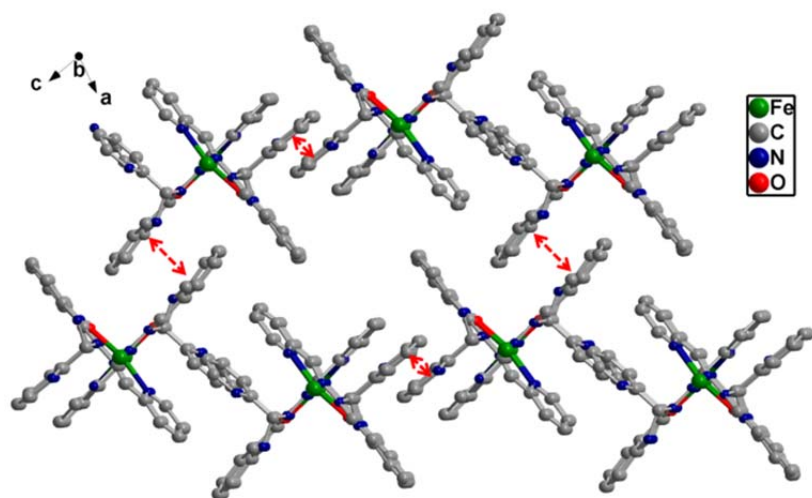

(b)

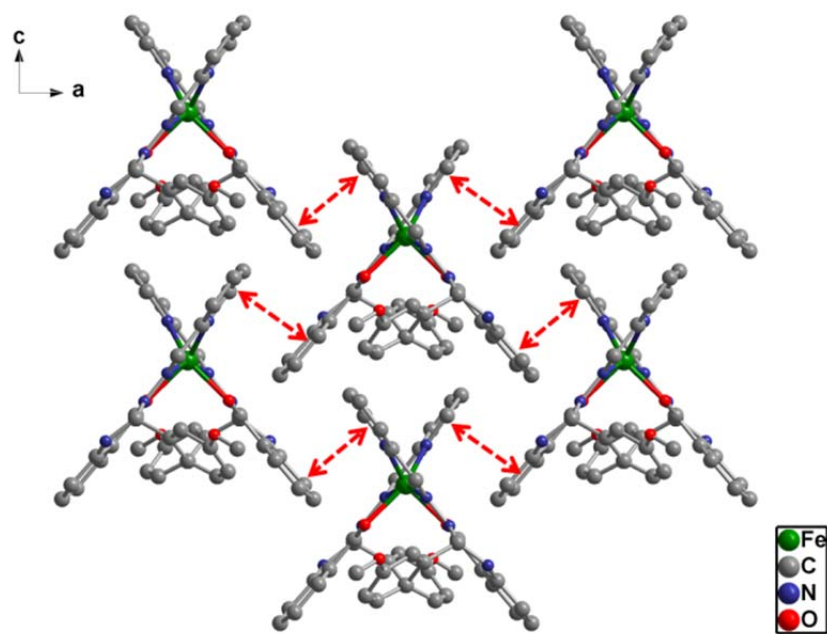

**Figure S10.** Crystal packing portion of the crystal structure of **2** (100 K, a) and **3** (200 K, b) at, as viewed along the crystallographic *b* axis, highlighting the intermolecular  $\pi \dots \pi$  stacking.

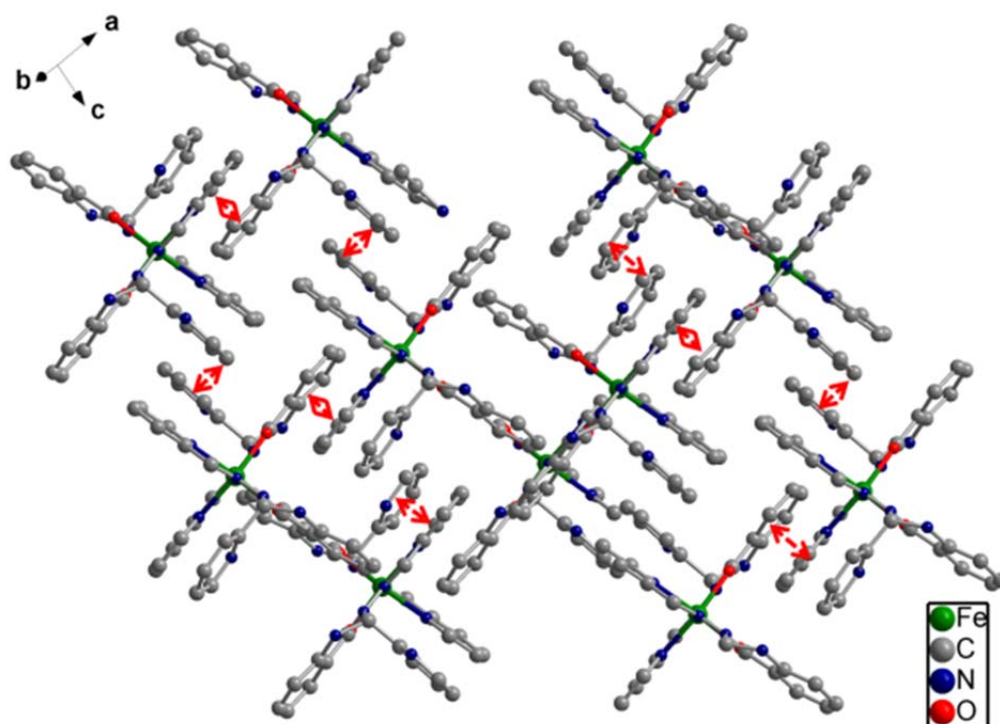

**Figure S11.** Crystal packing portion of the crystal structure of **5** as viewed along the crystallographic *b* axis, highlighting the intermolecular  $\pi \dots \pi$  stacking.

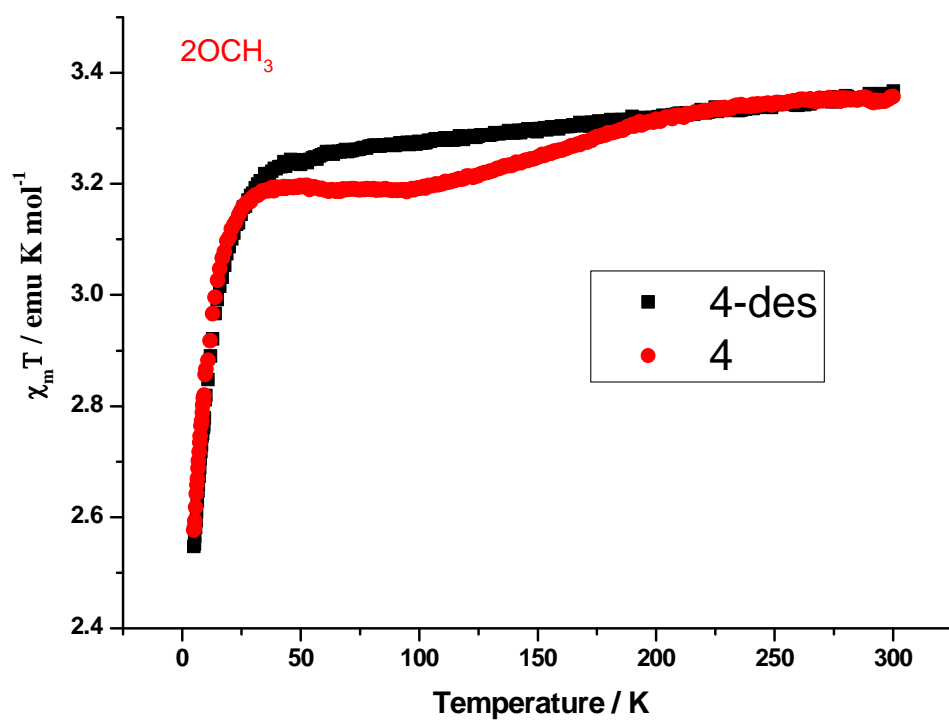

(a)

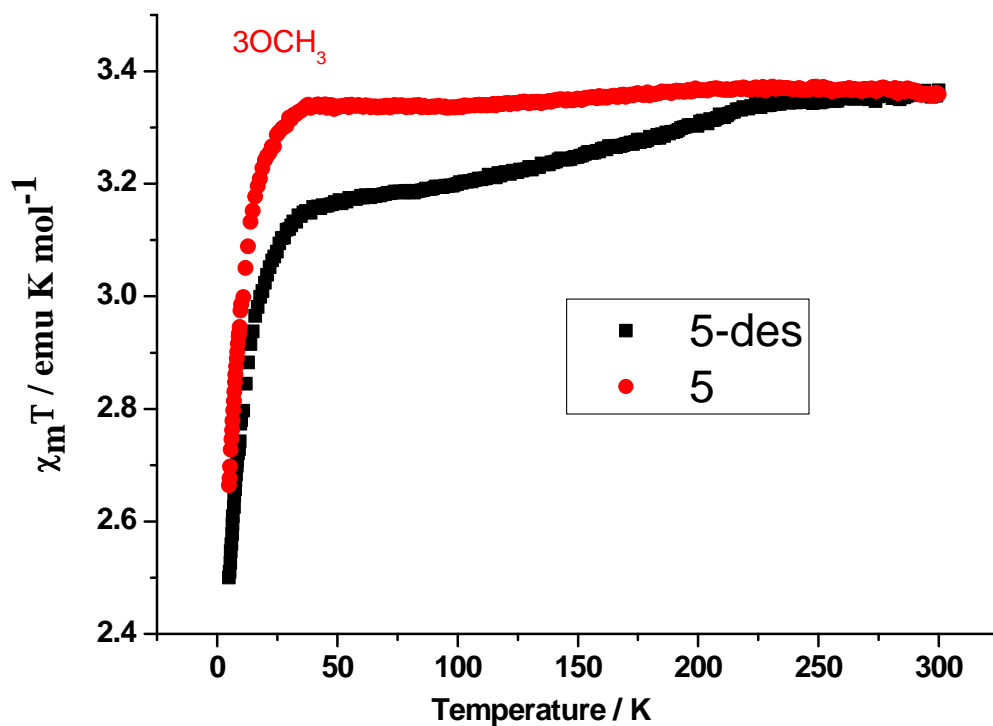

(b)

**Figure S12.** (a) Plots of  $\chi_m T$  versus  $T$  for compounds 4, 5 and their corresponding desolvated samples.

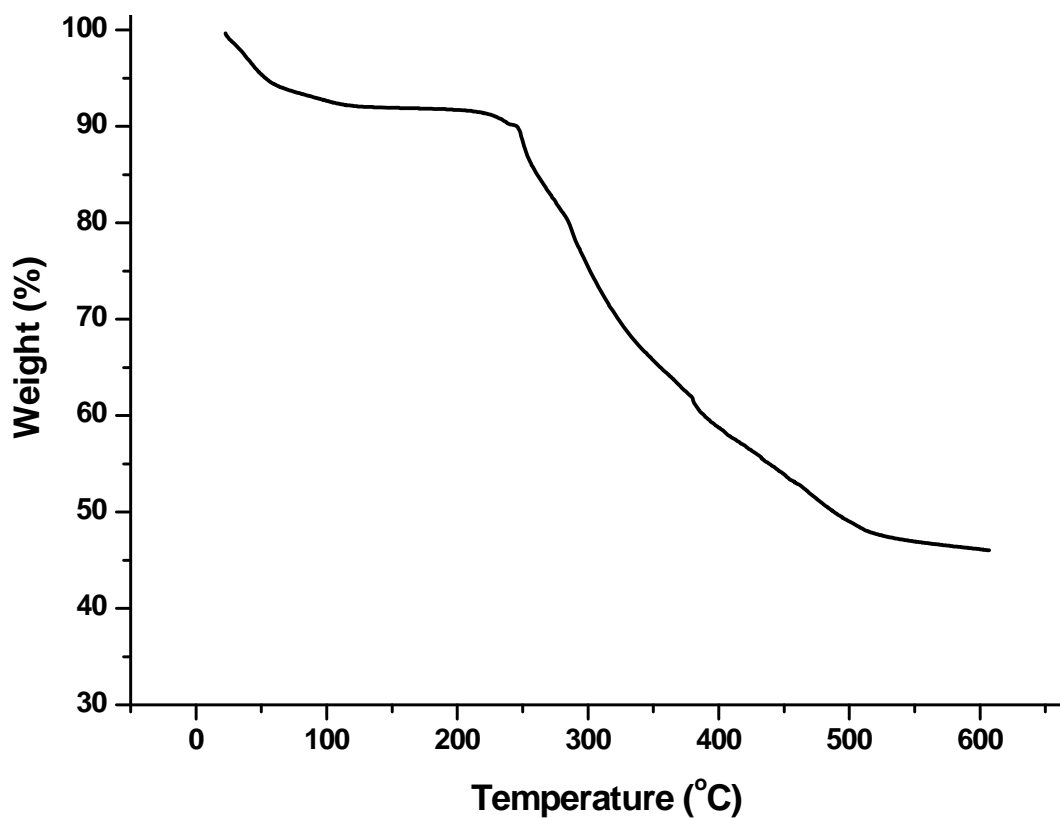

**Figure S13.** TGA curves of complex  $[\text{Fe}(\text{pq-2py})_2](\text{BF}_4)_2 \cdot 2\text{CH}_3\text{CN} \cdot 1.75\text{H}_2\text{O}$  (**2**) .

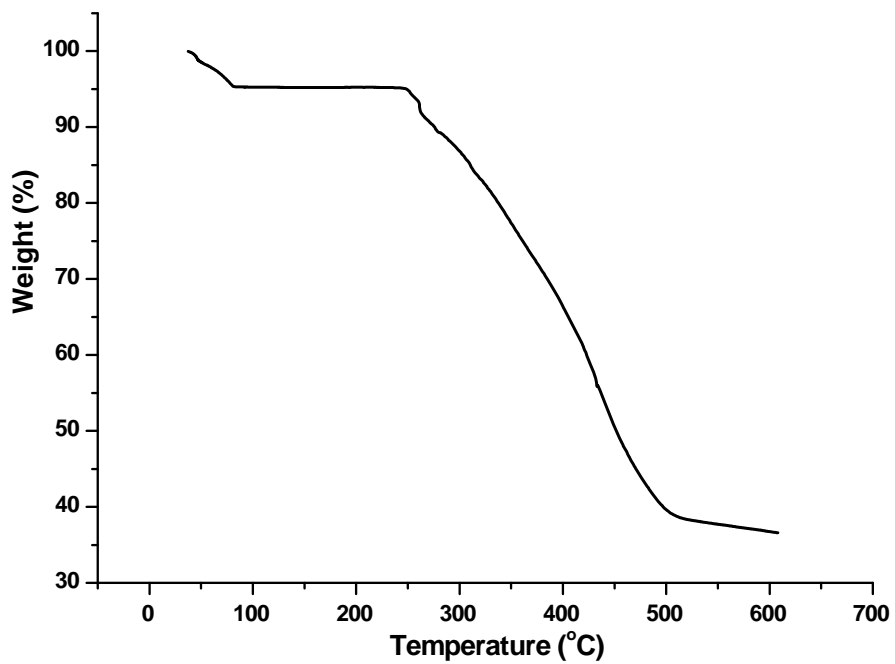

**Figure S14.** TGA curves of complex  $[\text{Fe}(\text{pq-2py})_2](\text{CF}_3\text{SO}_3)_2 \cdot \text{CH}_3\text{CN} \cdot \text{CH}_3\text{OH}$  (**3**)
